# Supplementary material
Source: MDPI journal article supplement (https://www.mdpi.com/2071-1050/13/20/11290)
Supplement: s1 [file s1]

Archive with 2 entries (2 files):
- Supplement 1. Czechia.  1230475 WORD.pdf
- Supplement 2.  Slovenia. 1230475 WORD.pdf
